# Supplementary material for: New York Physicians' Perspectives and Knowledge of the State Medical Marijuana Program
Source: PubMed Central journal article supplement (PMC5899285; doi:10.1089/can.2017.0046), 2018-03-01

**Supplementary Table S1. Societies, Academic Departments and Organizations Contacted to Participate in Survey**

Specialty societies

New York Society of Addiction Medicine  
The NYS Society of Allergy & Immunology, Inc.  
NYS Society of Anesthesiologists, Inc.  
NYS Chapter of the American College of Cardiology  
NYS Society of Dermatology and Dermatologic Surgery  
NYS Chapter American College of Emergency Physicians  
NYS Academy of Family Physicians  
New York Chapter American College of Physicians  
New York State Neurological Society, Inc.  
NYS Neurosurgical Society, Inc.  
American Congress Obstetricians & Gynecologists-District II  
New York Occupational and Environmental Medical Association  
NYS Society of Medical Oncologists and Hematologists, Inc.  
NYS Ophthalmological Society  
NYS Society of Orthopedic Surgeons, Inc.  
NYS Society of Otolaryngology-Head and Neck Surgery  
NYS Society of Pathologists  
American Academy of Pediatrics- District II  
NYS Society of Physical Medicine and Rehabilitation, Inc.  
NY Regional Society of Plastic and Reconstructive Surgery  
New York State Society of Plastic Surgeons  
NYS Psychiatric Association, Inc.  
The NYS Radiological Society, Inc.  
New York State Rheumatology Society  
NYS Chapter of the American Society for Metabolic and Bariatric Surgery  
New York Chapter of the American College of Surgeons, Inc.  
NY Society for Surgery of the Hand  
New York State Thoracic Society  
NYS Urological Society  
New York Society of Interventional Pain Physicians  
NY Pain Society  
NYS of Osteopathic Medicine  
New York Academy of Medicine  
Medical Society of the State of New York

County societies

Medical Society County of Albany  
Medical Society County of Allegany  
Bronx County Medical Society, Inc.  
Broome County Medical Society, Inc.  
Medical Society County of Cattaraugus  
Cayuga County Medical Society, Inc.  
Medical Society County of Chautauqua  
Chemung County Medical Society, Inc.  
Medical Society County of Chenango  
Medical Society County of Clinton  
Medical Society of the County of Columbia, Inc.  
Cortland County Medical Society  
Delaware County Medical Society  
Dutchess County Medical Society  
Medical Society County of Erie  
Medical Society County of Essex  
Medical Society of the County of Franklin, Inc.  
Medical Society of the County of Fulton  
Medical Society County of Genesee  
Medical Society County of Greene  
Medical Society County of Herkimer  
Jefferson County Medical Society  
Medical Society County of Kings, Inc.  
Lewis County Medical Society  
Medical Society of Livingston, Inc.  
Medical Society County of Madison, Inc.  
Monroe County Medical Society  
Medical Society of the County of Montgomery  
Nassau County Medical Society, Inc.  
New York County Medical Society, Inc.

**Supplementary Table S1. (Continued)**

Medical Society County of Niagara  
Medical Society County of Oneida, Inc.  
Onondaga County Medical Society, Inc.  
Medical Society of the County of Ontario, Inc.  
Medical Society County of Orange, Inc.  
Medical Society County of Orleans  
Medical Society County of Oswego  
Otsego County Medical Society  
Putnam County Medical Society  
Medical Society County of Queens, Inc.  
Medical Society County of Rensselaer  
Richmond County Medical Society, Inc.  
Medical Society County of Rockland  
Saratoga County Medical Society, Inc.  
Medical Society County of Schenectady  
Medical Society of the County of Schoharie  
Schuyler County Medical Society  
Seneca County Medical Society, Inc.  
Medical Society of the County of St. Lawrence, Inc.  
Steuben County Medical Society, Inc.  
Suffolk County Medical Society, Inc.  
Medical Society County of Sullivan  
Tompkins County Medical Society  
Medical Society County of Ulster  
Warren County Medical Society  
Medical Society County of Washington  
Wayne County Medical Society  
Medical Society County of Westchester  
Medical Society of the County of Wyoming  
Medical Society of the County of Yates  
Academic departments in medical centers  
NYU School of Medicine  
Icahn School of Medicine Mount Sinai  
New York Presbyterian Weill Cornell Medical Center  
New York Presbyterian Columbia University Medical Center  
New York Medical College  
Montefiore Medical Center  
State University of New York Upstate  
Memorial Sloan Kettering Cancer Center  
State University of New York Downstate  
State University of New York Stony Brook  
New York Institute of Technology  
Northwell/Hofstra  
SUNY Upstate Medical University  
Others  
NYC Health Commissioner  
Iroquois Healthcare Association  
Independent Doctors of NY  
Public Health Association of NYC  
Compassionate Care NY

(continued)

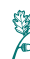

Supplement: Supp_Table1.pdf [file Supp_Table1.pdf]
